# Supplementary material for: Evaluation of expressive writing for postpartum health: a randomised controlled trial
Source: Springer Nature journal article supplement (doi:10.1007/s10865-018-9970-3), 2018-10-01

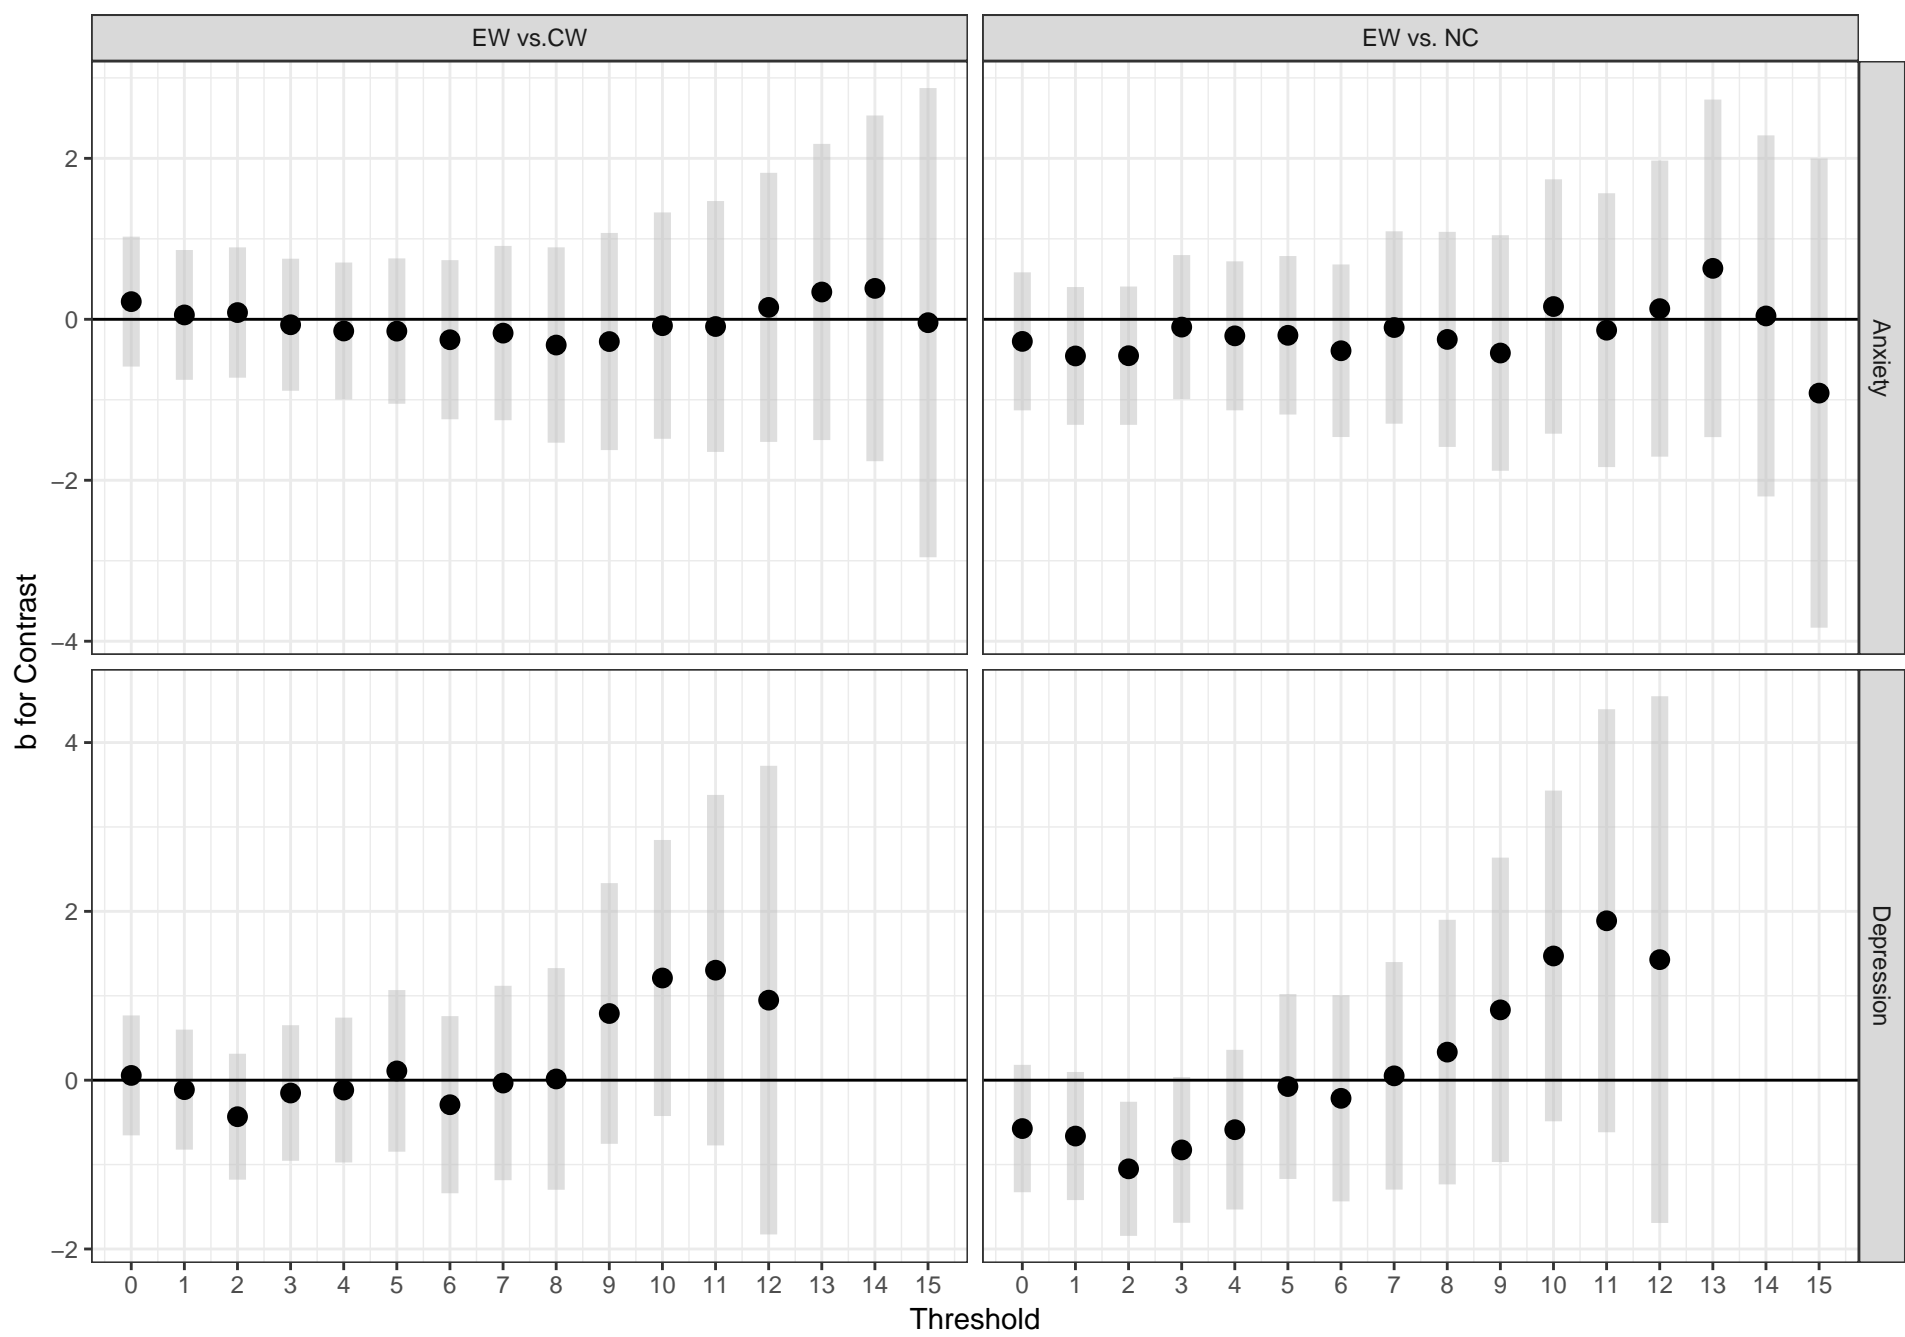

Supplement: MOESM1 [file 16179214]
